# Supplementary material
Source: MDPI journal article supplement (https://www.mdpi.com/1999-4907/13/3/473)
Supplement: s1 [file s1 › forests-1616090-supplementary.pdf]

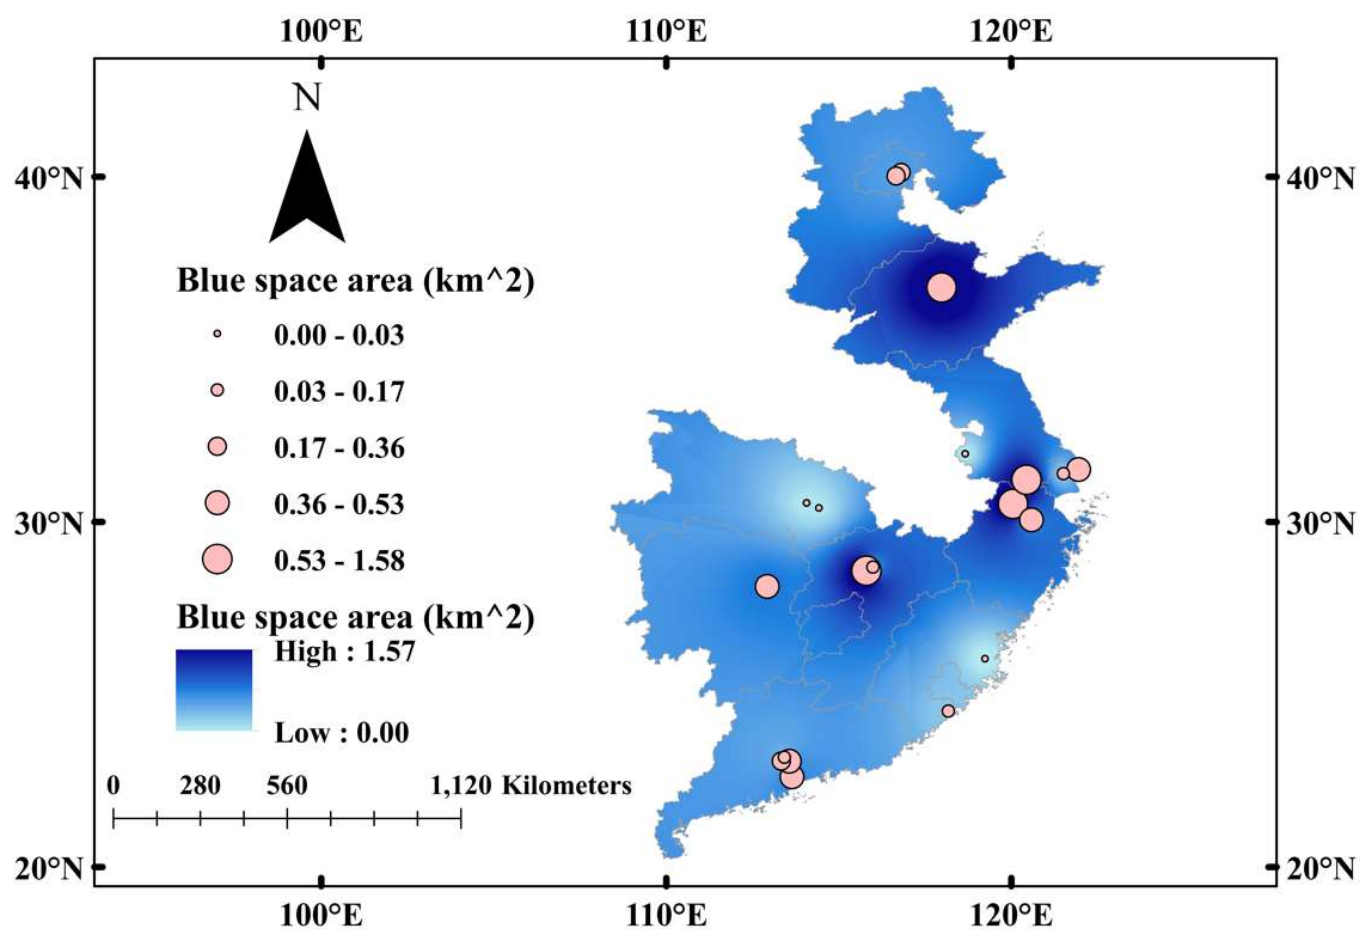

Figure S1. Spatial distributions of blue space areas in wetland parks.

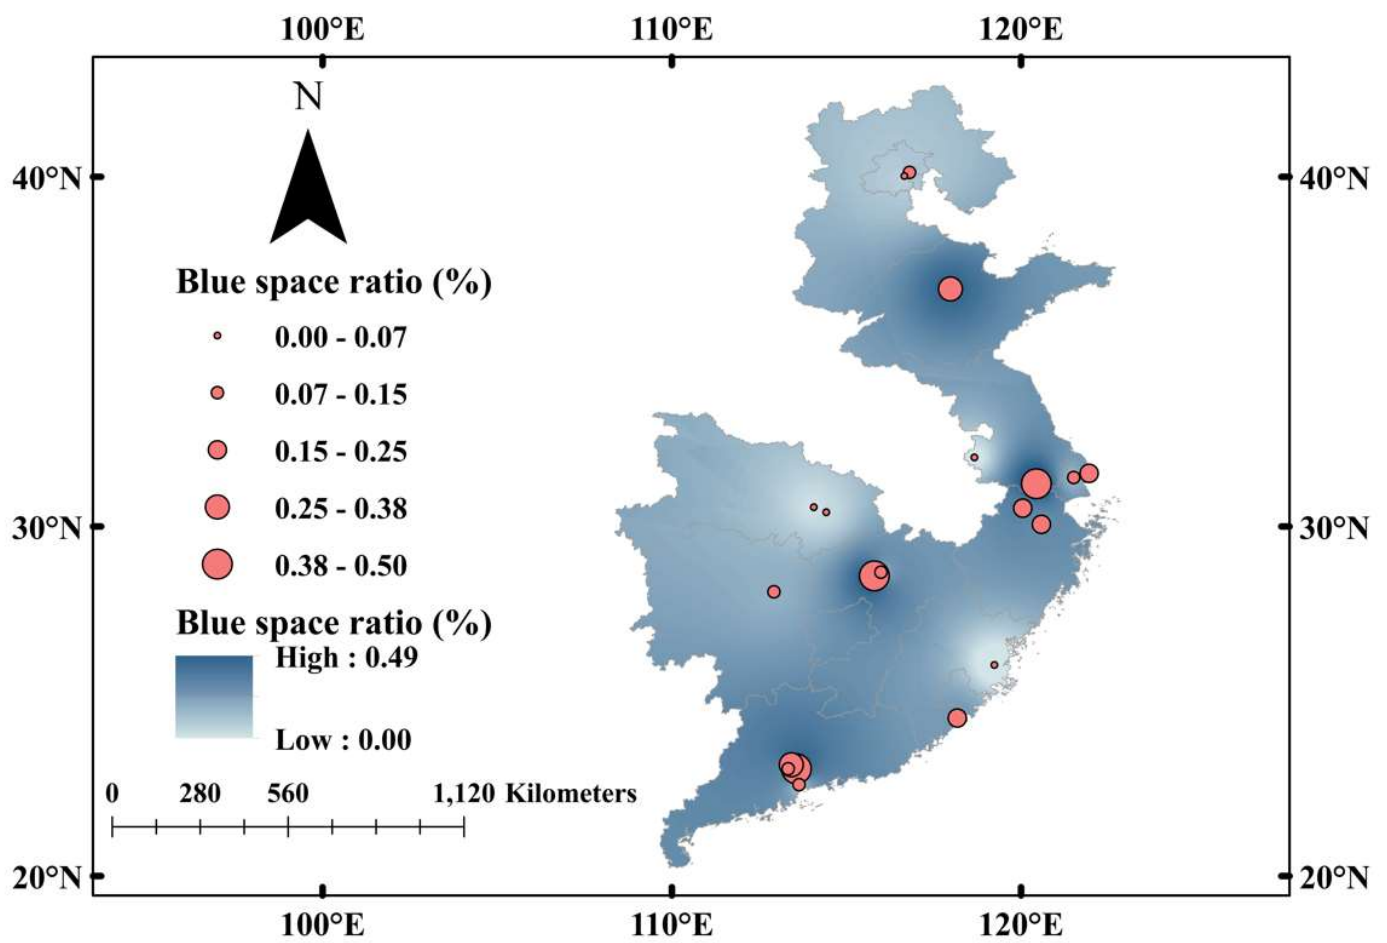

Figure S2. Spatial distributions of blue space area ratios in wetland parks.

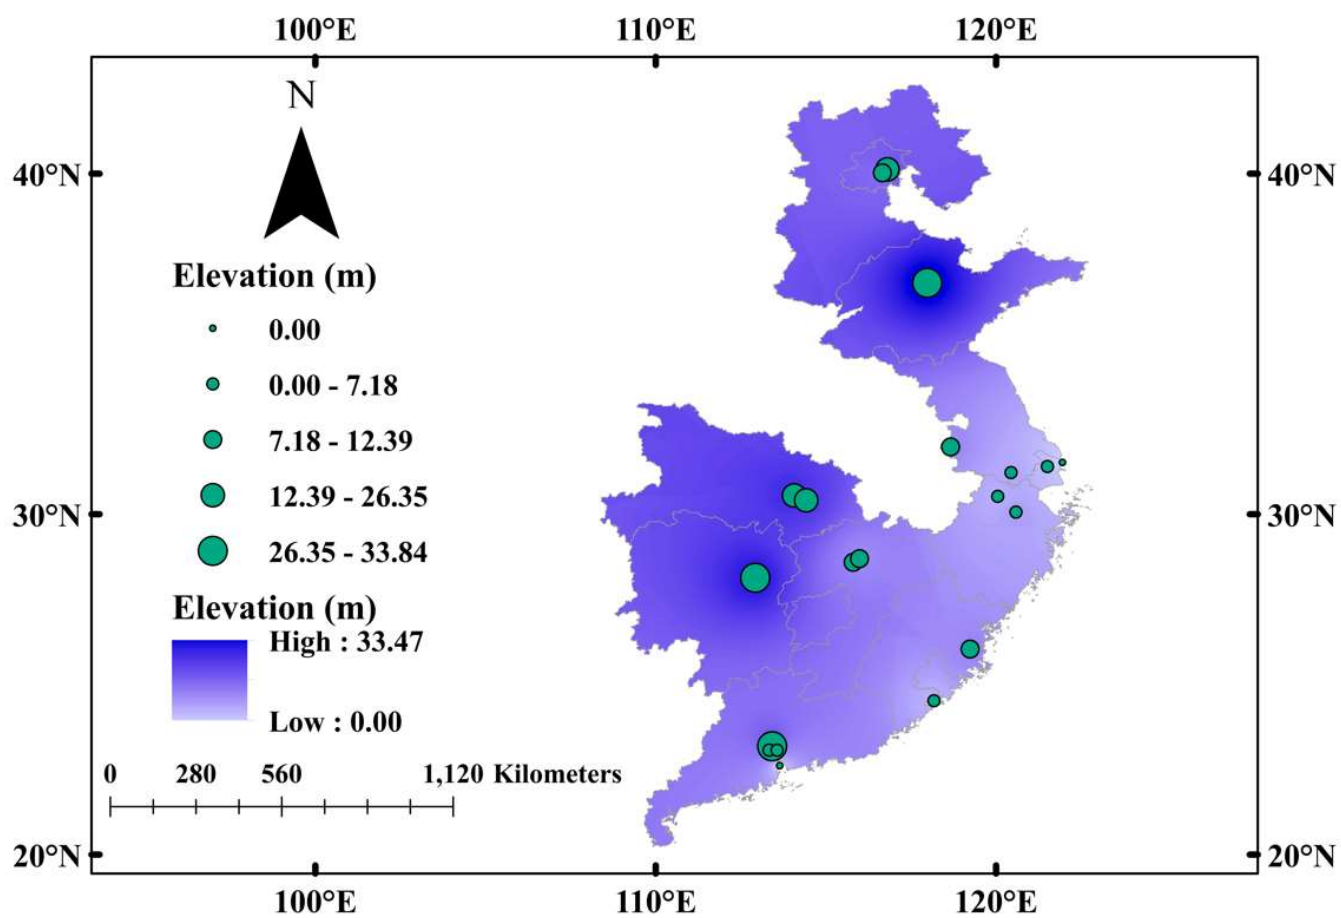

Figure S3. Spatial distributions of elevations in wetland parks.

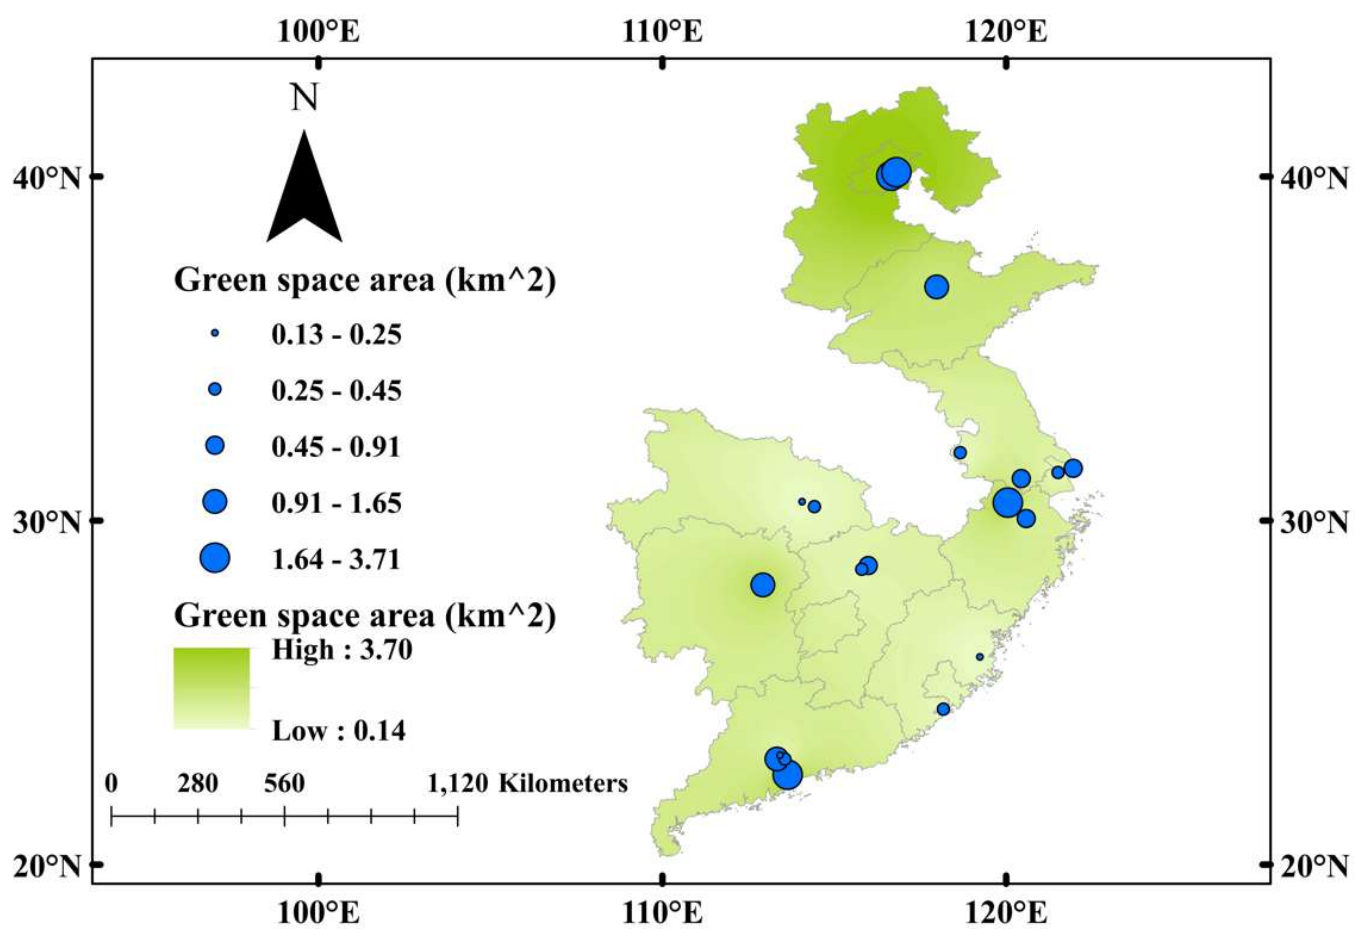

Figure S4. Spatial distribution of green space area in wetland parks.

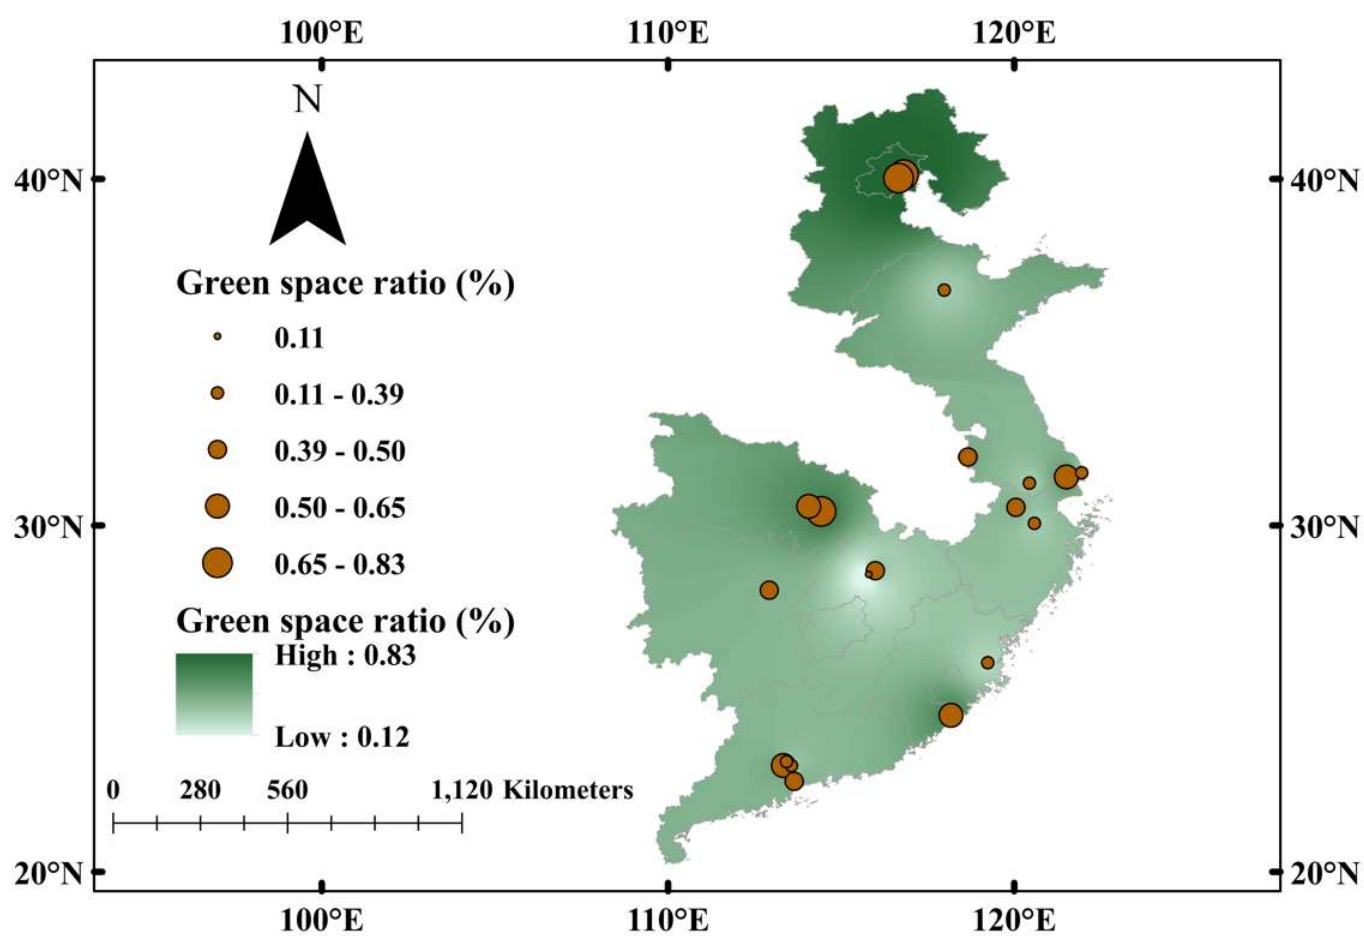

**Figure S5.** Spatial distribution of green space area ratios in wetland parks.

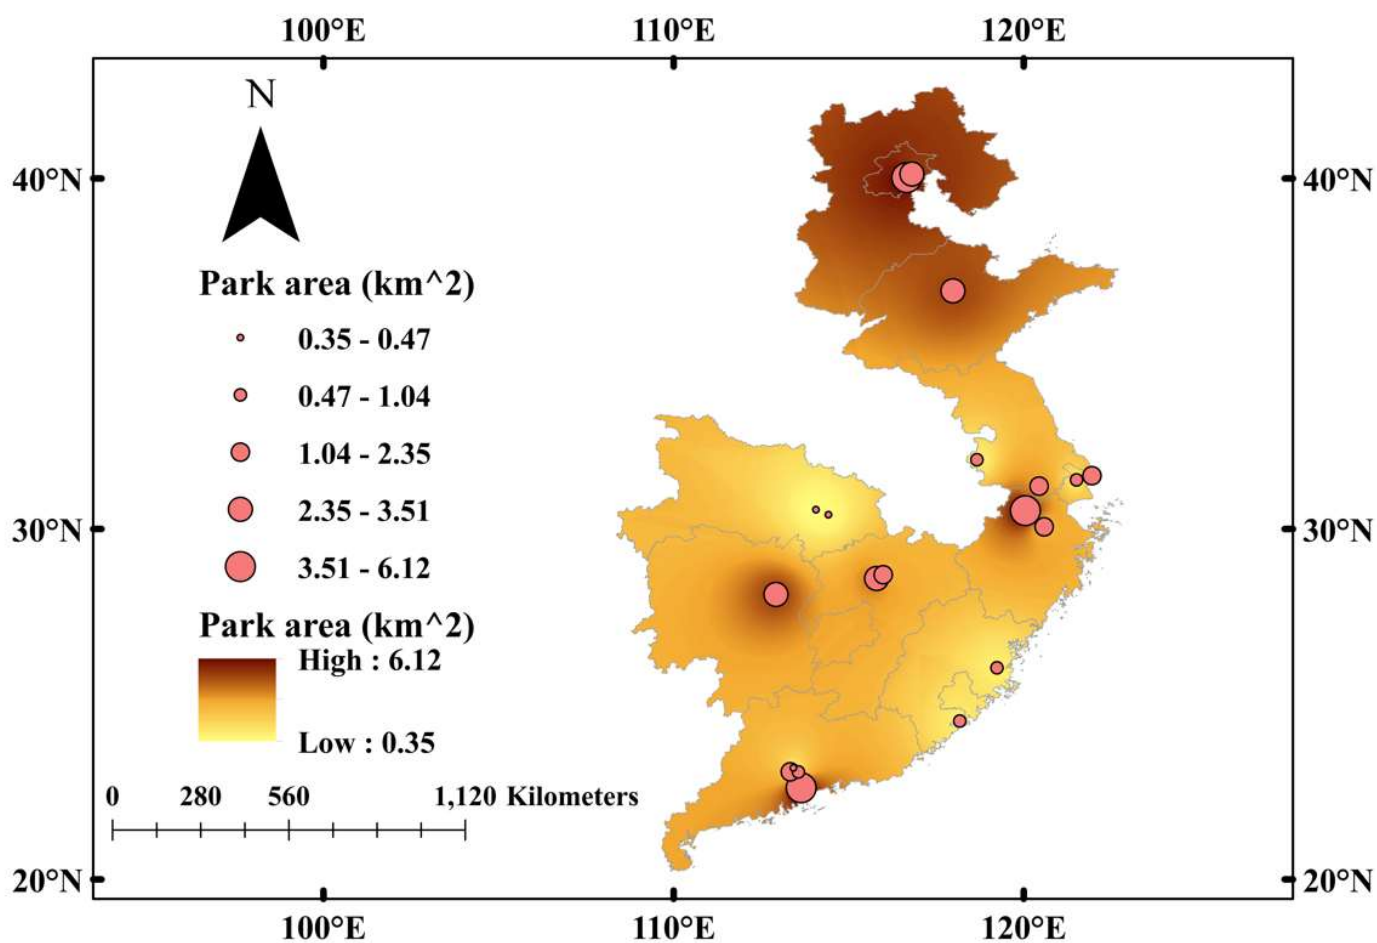

Figure S6. Spatial distribution of park area ratios in wetland parks.

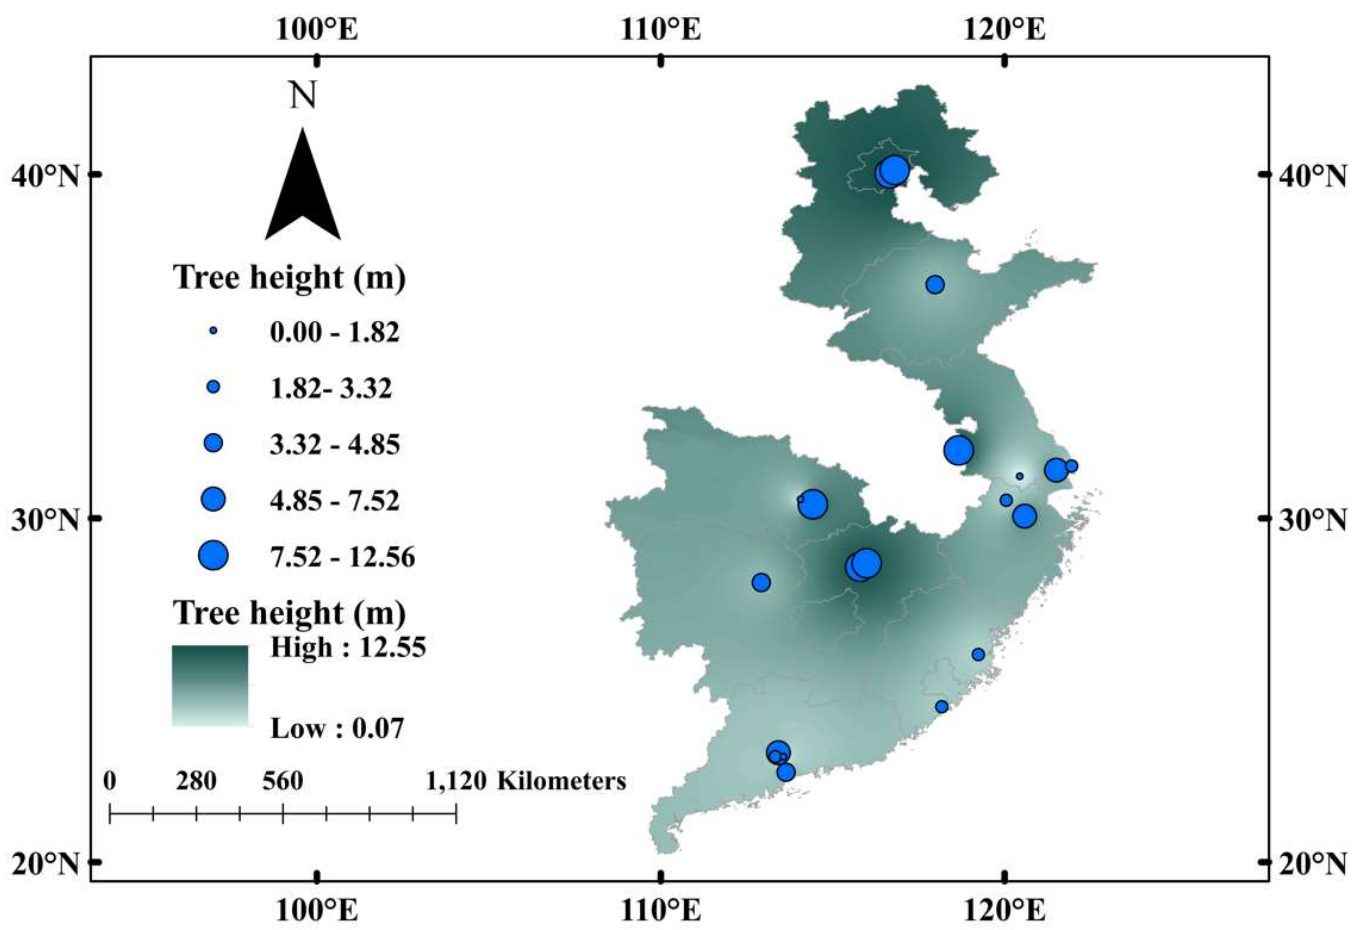

Figure S7. Spatial distribution of tree height in wetland parks.
